# Supplementary material
Source: publisher figshare collection journal article supplement (https://karger.figshare.com/articles/dataset/_/4781080)

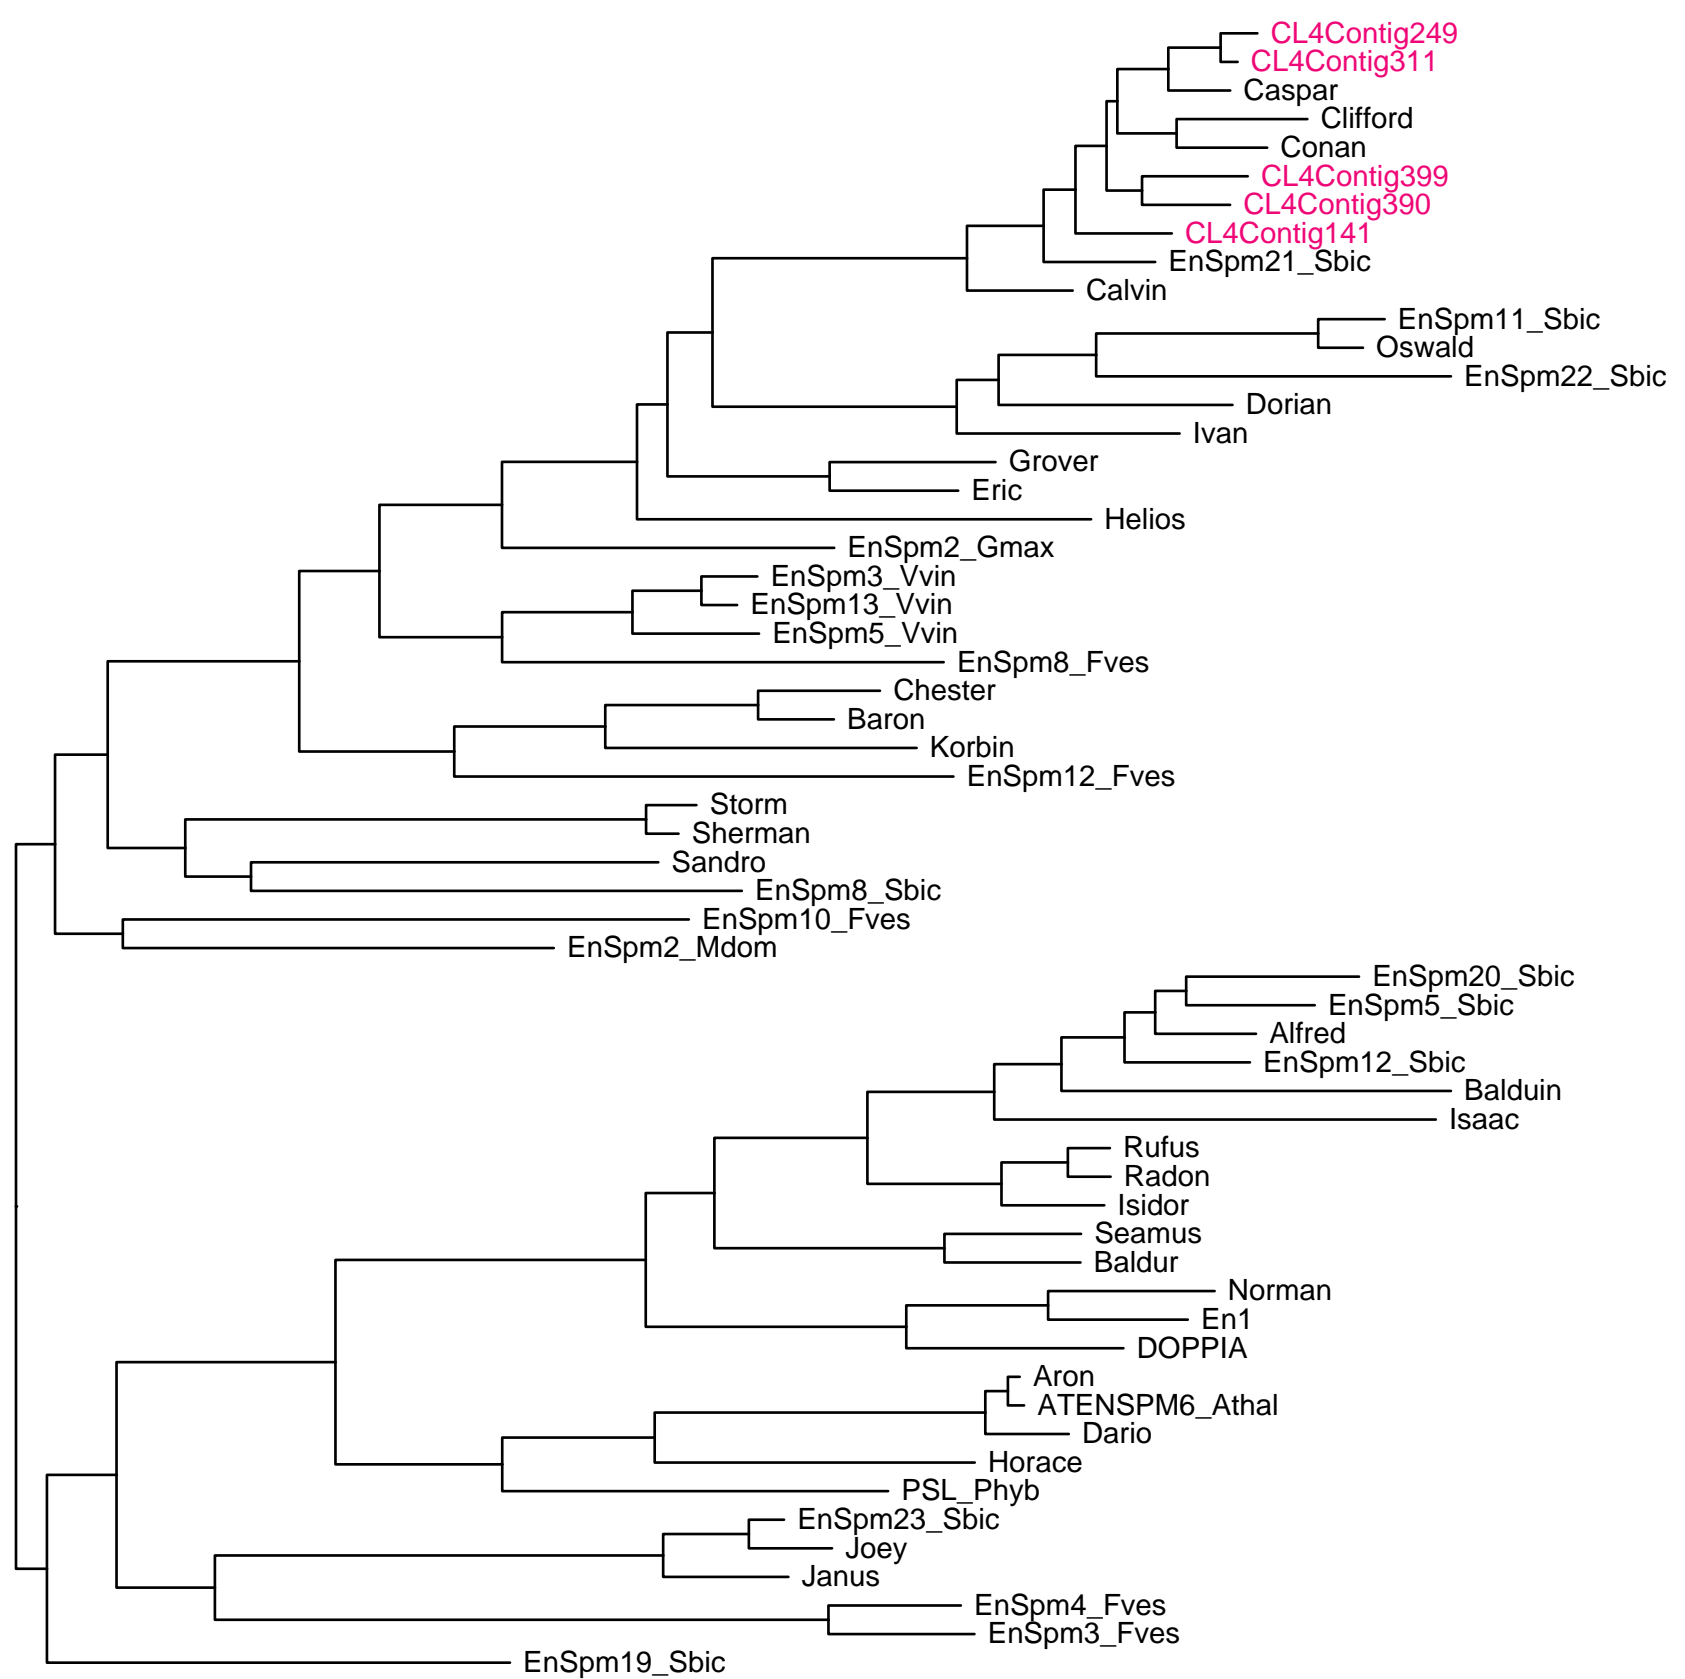

Supplement: Supplementary file 1 [file 1]

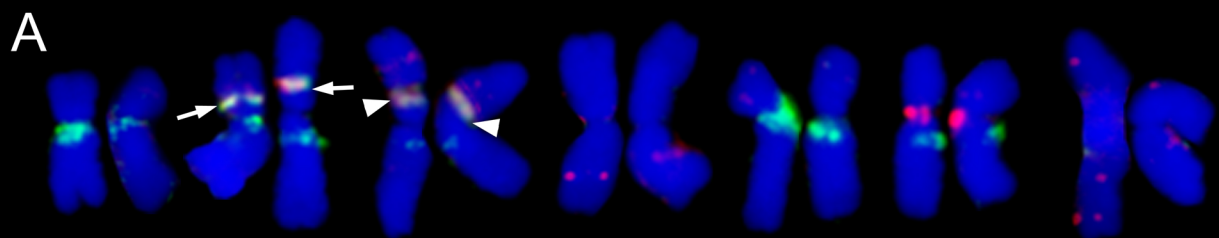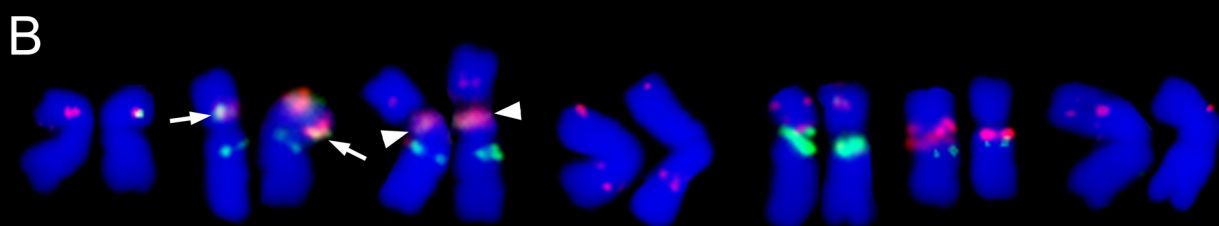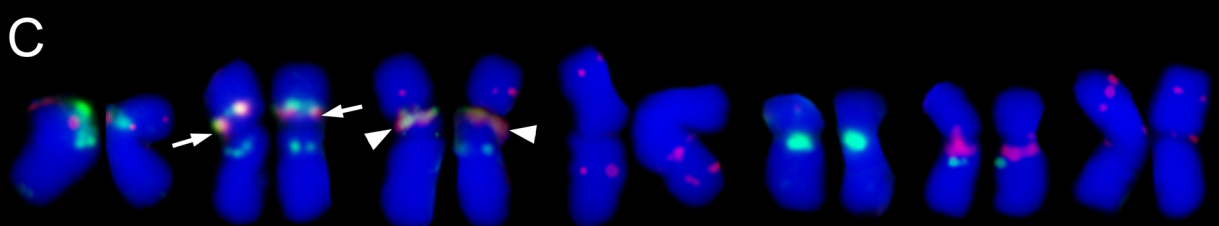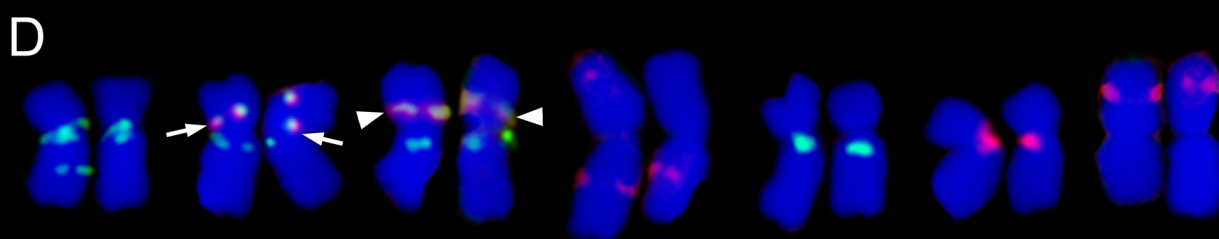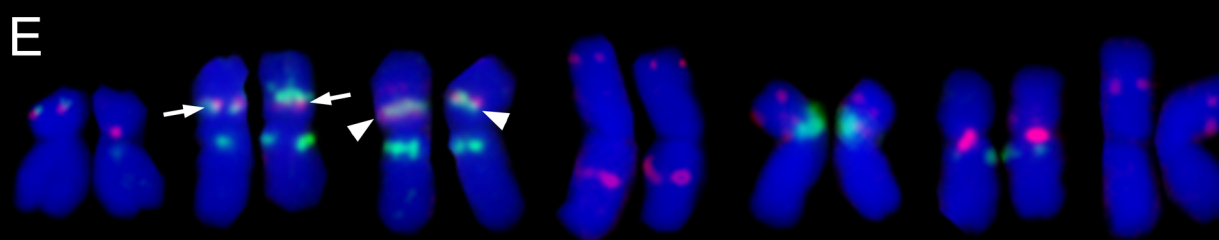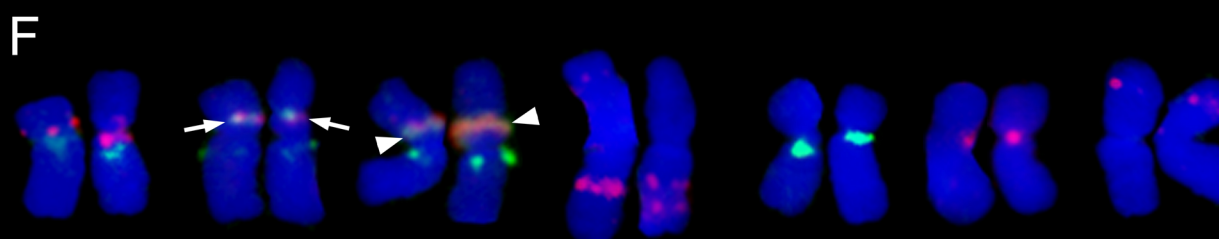

1 2 3 4 5 6 7

Supplement: Supplementary file 2 [file 1]
